# Supplementary material
Source: Springer Nature journal article supplement (https://www.springermedizin.de/resource/supplementary/12879_2012_2262_MOESM2_ESM.pdf/9443738)

(A)

Refolded  
RC-1

Mis-folded  
RC-1

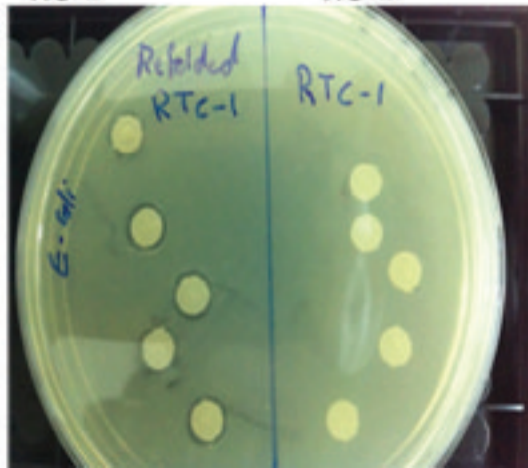

(B)

Refolded  
RC-1

Mis-folded  
RC-1

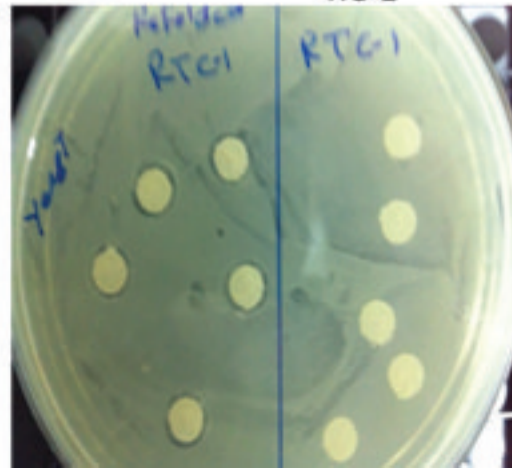

Supplement: MOESM2 [file 9443738]
